# Supplementary material
Source: Springer Nature journal article supplement (https://www.springermedizin.de/resource/supplementary/12913_2012_3065_MOESM3_ESM.pdf/9532278)

Diarrhoea patients classified using terms consistent with CPGs

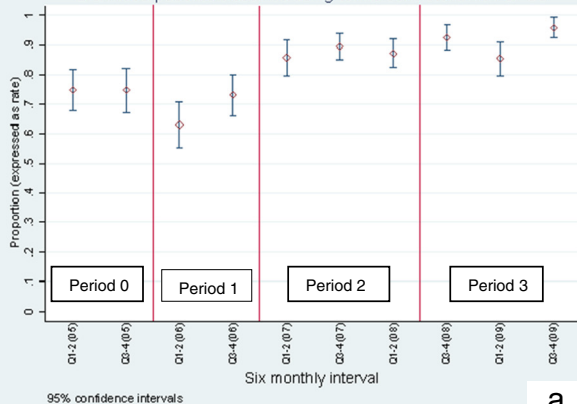

Diarrhoea patients prescribed Plan C consistent with CPGs

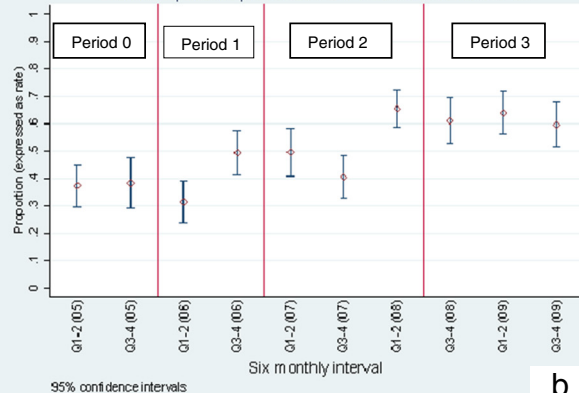

Diarrhoea patients who had IVF monitored

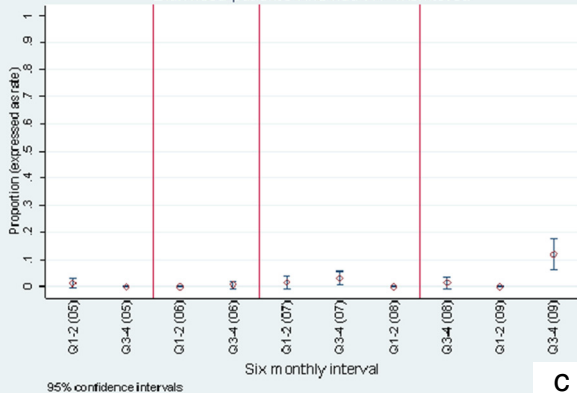

Pneumonia patients given penicillin in the frequency prescribed

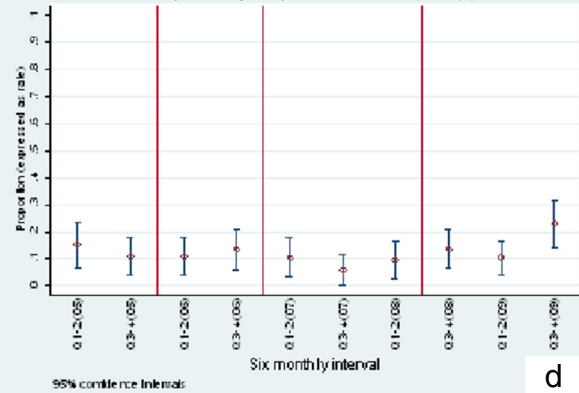

Supplement: MOESM3 [file 9532278]
